# Supplementary material for: Structures of 4-substituted thioanisole radical cations studied by time-resolved resonance Raman spectroscopy during pulse radiolysis and theoretical calculations
Source: Royal Society of Chemistry journal article supplement (doi:10.1039/c6ra21460f), 2016-01-01
Supplement: c6ra21460f1.pdf [file c6ra21460f1.pdf]

## Supporting Information

# Structures of 4-Substituted Thioanisole Radical Cations Studied by Time-resolved Resonance Raman Spectroscopy during Pulse Radiolysis and Theoretical Calculations

*Sachiko Tojo, Mamoru Fujitsuka,\* and Tetsuro Majima\**

The Institute of Scientific and Industrial Research (SANKEN), Osaka University, Mihogaoka 8-1,  
Ibaraki, Osaka 567-0047, Japan,

E-mail: [fuji@sanken.osaka-u.ac.jp](mailto:fuji@sanken.osaka-u.ac.jp); [majima@sanken.osaka-u.ac.jp](mailto:majima@sanken.osaka-u.ac.jp)

## Raman spectra of conformers in the neutral state.

Here, conformers of the compounds in this study were studied by DFT calculations. To find conformers, initial structures, which were generated by systematically changing dihedral angle(s) formed by benzene rings and substituent(s) ( $\phi(C_2C_1S_7C_8)$  and  $\phi(C_3C_4X_9Y_{10})$  in Chart S1), were subjected to optimization. For MTPM, MTPA, and MTA, 11 initial structures were subjected to optimization, while 4 structures were used for optimization of MTB and MTT. For optimization at (U)B3LYP/6-311+g(d,p) level using Gaussian 09 package, ultrafine grid and tight convergence were employed, and absence of imaginary frequency was confirmed. Following Tables summarized dihedral angle(s) ( $\phi$ ) and sum of electronic and zero-point energies of the optimized structures. In these table, conformers are distinguished by small alphabet (a, b, c...) and symmetrical conformers are ignored.

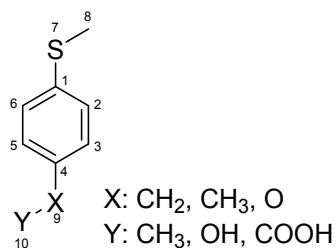

### Chart S1.

**Table S1.** Conformers of MTPM in neutral and radical cation state estimated by DFT calculations at (U)B3LYP/6-311+G(d,p) level.<sup>a</sup>

|       | Charge | $\phi(C_2C_1S_7C_8)$ | $\phi(C_3C_4X_9Y_{10})$ | sum of electronic and zero-point energies (eV) |
|-------|--------|----------------------|-------------------------|------------------------------------------------|
| MTPMa | 0      | 0.7                  | 153.4                   | -21340.437                                     |
| MTPMb | 0      | 1.5                  | -15.2                   | -21340.444                                     |
| MTPMc | 0      | 89.8                 | -12.2                   | -21340.455                                     |
| MTPMd | 1      | 0.0 (0.0)            | 0.0 (0.0)               | -21333.063                                     |

|       |   |           |               |            |
|-------|---|-----------|---------------|------------|
| MTPMe | 1 | 0.0 (0.0) | 180.0 (180.0) | -21333.061 |
|-------|---|-----------|---------------|------------|

<sup>a</sup> Numbers in parentheses are estimated at UBP86/TZVP.

**Table S2.** Conformers of MTPA in neutral and radical cation state estimated by DFT calculations at (U)B3LYP/6-311+G(d,p) level.<sup>a</sup>

|       | Charge | $\phi(\text{C}_2\text{C}_1\text{S}_7\text{C}_8)$ | $\phi(\text{C}_3\text{C}_4\text{X}_9\text{Y}_{10})$ | sum of electronic and zero-point energies (eV) |
|-------|--------|--------------------------------------------------|-----------------------------------------------------|------------------------------------------------|
| MTPAa | 0      | 1.5                                              | -106.5                                              | -24426.053                                     |
| MTPAb | 0      | 2.6                                              | -71.8                                               | -24426.053                                     |
| MTPAc | 0      | 80.8                                             | 75.4                                                | -24426.039                                     |
| MTPAd | 0      | 82.1                                             | 71.0                                                | -24426.030                                     |
| MTPAe | 1      | 0.2 (- <sup>b</sup> )                            | -121.4 (- <sup>b</sup> )                            | -24418.467                                     |
| MTPAf | 1      | 0.3 (0.3)                                        | -57.5 (-81.0)                                       | -24418.477                                     |

<sup>a</sup> Numbers in parentheses are estimated at UBP86/TZVP. <sup>b</sup> Related structure did not obtained at the UBP86/TZVP level with Gaussian 09.

**Table S3.** Conformers of MTB in neutral and radical cation state estimated by DFT calculations at (U)B3LYP/6-311+g(d,p) level.<sup>a</sup>

|      | Charge | $\phi(\text{C}_2\text{C}_1\text{S}_7\text{C}_8)$ | $\phi(\text{C}_3\text{C}_4\text{X}_9\text{Y}_{10})$ | sum of electronic and zero-point energies (eV) |
|------|--------|--------------------------------------------------|-----------------------------------------------------|------------------------------------------------|
| MTBa | 0      | 0.0                                              | -                                                   | -18224.146                                     |
| MTBb | 0      | 89.0                                             | -                                                   | -18224.127                                     |
| MTBc | 1      | 0.0 (0.0)                                        | -                                                   | -18216.412                                     |

<sup>a</sup> Numbers in parentheses are estimated at UBP86/TZVP.

**Table S4.** Conformers of MTT in neutral and radical cation state estimated by DFT calculations at (U)B3LYP/6-311+G(d,p) level.<sup>a</sup>

|      | Charge | $\phi(\text{C}_2\text{C}_1\text{S}_7\text{C}_8)$ | $\phi(\text{C}_3\text{C}_4\text{X}_9\text{Y}_{10})$ | sum of electronic and zero-point energies (eV) |
|------|--------|--------------------------------------------------|-----------------------------------------------------|------------------------------------------------|
| MTTa | 0      | 0.0                                              | -                                                   | -19293.568                                     |
| MTTb | 0      | 88.9                                             | -                                                   | -19293.562                                     |
| MTTc | 1      | 0.0 (0.0)                                        | -                                                   | -19286.092                                     |

<sup>a</sup> Numbers in parentheses are estimated at UBP86/TZVP.

**Table S5.** Conformers of MTA in neutral and radical cation state estimated by DFT calculations at (U)B3LYP/6-311+G(d,p) level.<sup>a</sup>

|      | Charge | $\phi(\text{C}_2\text{C}_1\text{S}_7\text{C}_8)$ | $\phi(\text{C}_3\text{C}_4\text{X}_9\text{Y}_{10})$ | sum of electronic and zero-point energies (eV) |
|------|--------|--------------------------------------------------|-----------------------------------------------------|------------------------------------------------|
| MTAa | 0      | 0.0                                              | 0.0                                                 | -21340.495                                     |
| MTAb | 0      | 87.2                                             | 179.5                                               | -21340.522                                     |
| MTAc | 1      | 0.0 (0.0)                                        | 0.0 (0.0)                                           | -21333.331                                     |
| MTAd | 1      | 0.0 (0.0)                                        | 180.0 (180.0)                                       | -21333.345                                     |

<sup>a</sup> Numbers in parentheses are estimated at UBP86/TZVP.

In Figure S1, Raman spectrum of MTPM is compared with theoretically estimated Raman spectra of conformers. It should be noted, that the calculated wavenumbers were scaled by using a factor of 0.97. Raman peak positions depend on the structures: For example, ring stretching mode of MTPMa, -b, and -c located at 1597, 1598, and 1592  $\text{cm}^{-1}$ . These are difficult to distinguish with the present spectral resolution. Furthermore, small energy difference between these conformer (18 meV) indicates that the

all conformers are possible in the room temperature experiments. Thus, the present spectrum seems to sum of these conformers.

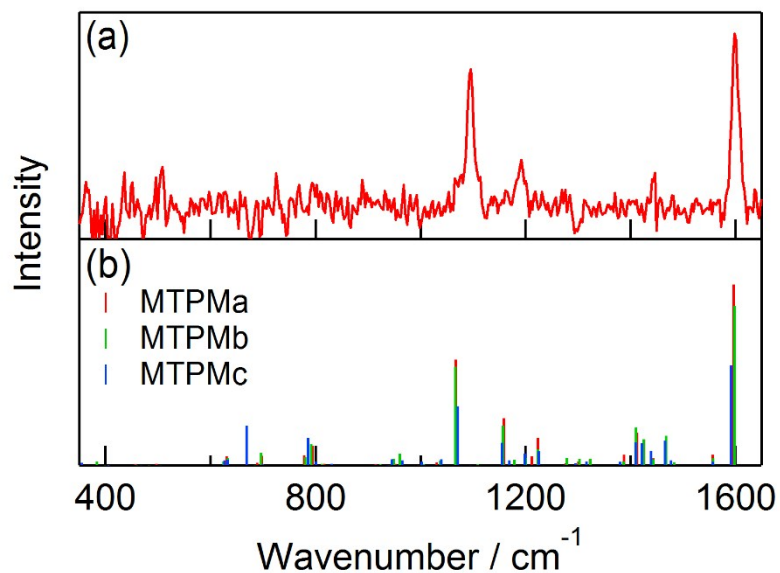

**Figure S1.** (a) Raman spectrum of MTPM in DCE. (b) Theoretically estimated Raman spectra of conformers at B3LYP/6-311+G(d,p) level.

**Table S6.** Observed Raman peaks of ArSCH<sub>3</sub>.

| Mode assignments                                      | MTPM                 | MTPA    | MTT     | MTB          | MTA             |
|-------------------------------------------------------|----------------------|---------|---------|--------------|-----------------|
| C=C str/r                                             | 1599 vs <sup>a</sup> | 1599 vs | 1601 vs | 1581 vs      | 1596 vs, 1570 s |
| CH bend/OCH <sub>3</sub>                              |                      |         |         |              | 1493 w          |
| CH bend/r                                             |                      |         |         | 1482, 1438 w |                 |
| CH bend/SCH <sub>3</sub>                              |                      |         |         |              | 1427 w          |
| CH bend/OCH <sub>3</sub>                              |                      |         |         |              | 1300 m          |
| C <sub>r</sub> -O str/C <sub>r</sub> OCH <sub>3</sub> |                      |         |         |              |                 |
| CH bend/CH <sub>3</sub>                               |                      |         | 1377 w  |              |                 |
| C <sub>r</sub> -C str/C <sub>r</sub> CH <sub>3</sub>  |                      |         | 1211 vw |              |                 |
| CH bend/r                                             | 1192 m               | 1192 m  | 1184 m  | 1159 w       | 1192 s          |
| C <sub>r</sub> -S str/C <sub>r</sub> SCH <sub>3</sub> | 1096 s               | 1093 s  | 1096 vs | 1090 s       | 1096 vs         |

|                                                       |        |       |       |
|-------------------------------------------------------|--------|-------|-------|
| CH bend/r                                             |        |       |       |
| Deformation/r                                         |        | 999 s |       |
| CH bend/r                                             |        |       |       |
| CH bend/SCH <sub>3</sub>                              |        |       |       |
| Breathing/r                                           | 794 w  |       | 800 m |
| S-CH <sub>3</sub> str                                 | 721 vw |       |       |
| C <sub>1</sub> -S str/C <sub>1</sub> SCH <sub>3</sub> |        | 690 w |       |
| Deformation/r                                         | 653 w  |       |       |

---

<sup>a</sup> Intensity description: vs = very strong, s = strong, m = medium, w = weak, vw = very weak.  
Abbreviations used in table: str: stretching, r: ring.

## Time-resolved Raman Spectra of MTPM<sup>•+</sup>

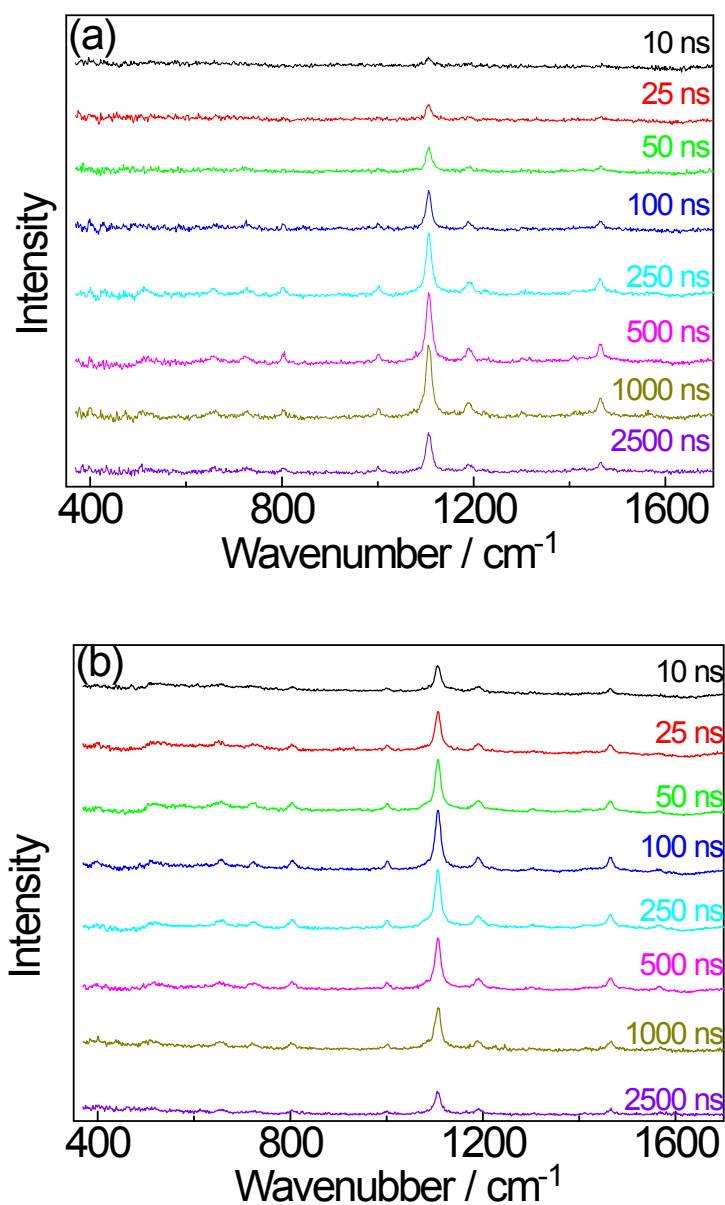

**Figure S2.** ns-TR<sup>3</sup> spectra observed at various time delays excited at 532 nm after an electron pulse during the pulse radiolysis of MTPM (a) 0.5 mM and (b) 5 mM in N<sub>2</sub>O-saturated aqueous solution (pH 7) containing NaBr (100 mM) excited at 532 nm.

## Raman Spectrum of $\text{Br}_2^{\bullet-}$

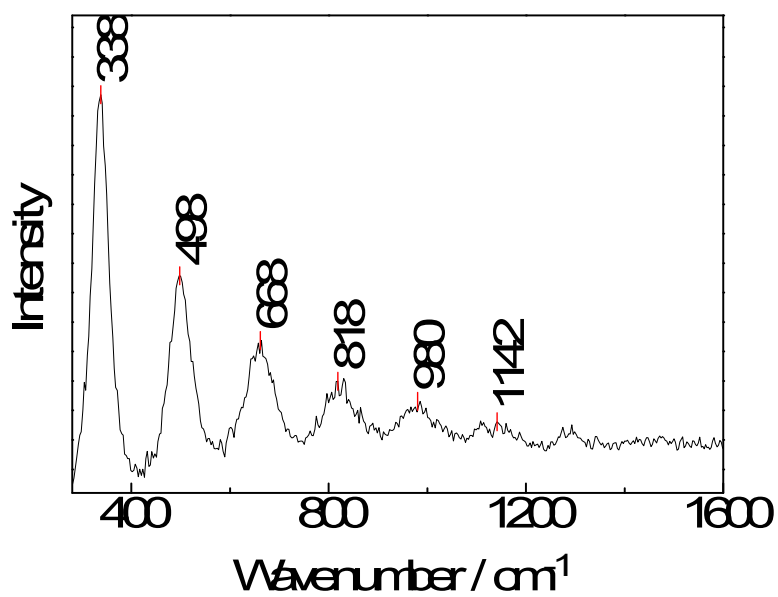

**Figure S3.** ns-TR<sup>3</sup> spectra of  $\text{Br}_2^{\bullet-}$  observed at 500 ns after an electron pulse during the pulse radiolysis of  $\text{N}_2\text{O}$ -saturated aqueous solution containing NaBr (100 mM) excited at 355 nm.



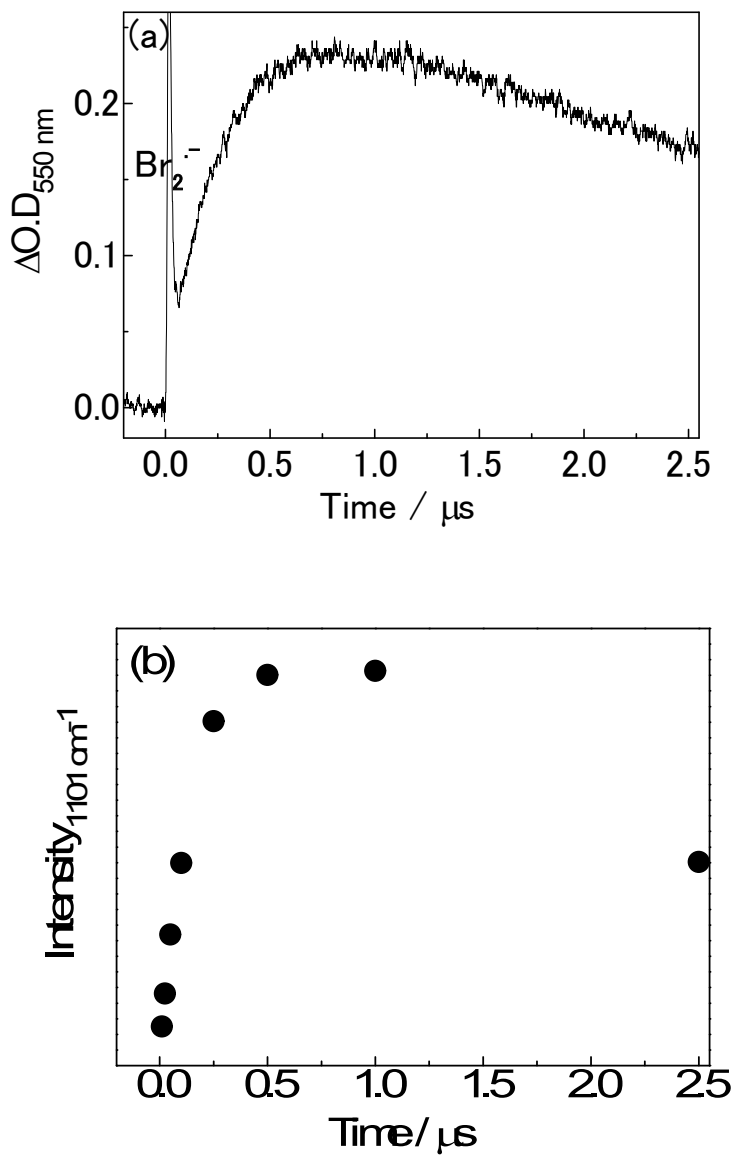

**Figure S4.** Time profiles of ns-TA at 550 nm showing the formation of MTPM<sup>•+</sup> (A) and ns-TR<sup>3</sup> at 1101  $cm^{-1}$  (B) after an electron pulse during the pulse radiolysis of MTPM with 0.5 mM in N<sub>2</sub>O-saturated aqueous solution (pH 7) containing NaBr (100 mM).

#### Assignments of resonance Raman peaks.

In the case of Raman spectrum measured under non-resonance condition, Raman peaks can be reasonably simulated by Gaussian 09 package. However, Gaussian 09 does not support resonance

Raman. At present, theoretical calculation of resonance Raman spectrum of the open shell system can be performed by NWChem which includes TD-DFT linear response module for unrestricted DFT calculation developed by Aquino and Schatz, recently. Thus, we used NWChem 6.6, to which available patches are applied. For calculation, becke88 perdw86 exchange-correlation functional and TZVP basis set were employed after their study. As in the case of neutral state, observed spectra of radical cations will be sum of those of several conformers because of small difference in the sum of electronic and zero-point energies (Table S1-S5).

TR<sup>3</sup> spectrum of MTB radical cation and theoretical calculation results are indicated in Figure S5 (Factor for wavenumber: 1.00). For comparison purpose, theoretically estimated non-resonance spectrum (Gaussian 09) is also indicated. Although NWChem underestimated intensity of a peak around 400 cm<sup>-1</sup>, other peaks are reasonably simulated. It can be seen that the present theory (BP86) and basis set underestimate wavenumber by 2-3%.

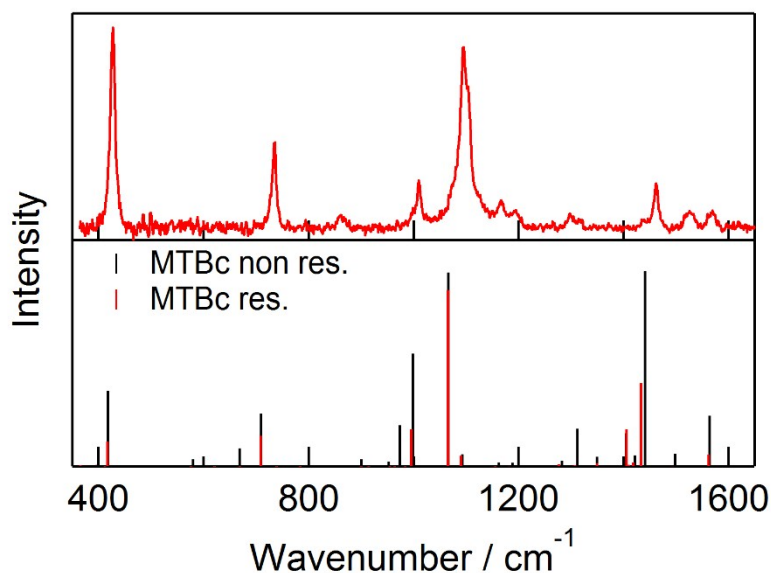

**Figure S5.** (Upper panel) TR<sup>3</sup> spectrum of MTB with 1 mM in N<sub>2</sub>O-saturated aqueous solution (pH 7) containing NaBr (100 mM) during pulse radiolysis. (Lower panel) Theoretically estimated Raman spectra of TMB radical cation under resonance and non-resonance conditions.

**Table S7.** Observed Raman peaks of ArSCH<sub>3</sub><sup>•+</sup>.

| Mode assignments                                        | MTPM <sup>•+</sup> | MTPA <sup>•+</sup>   | MTT <sup>•+</sup> | MTB <sup>•+</sup> | MTA <sup>•+</sup> |
|---------------------------------------------------------|--------------------|----------------------|-------------------|-------------------|-------------------|
| C=C str/r                                               | -                  | 1580 vw <sup>a</sup> | -                 | 1570, 1527 vw     | 1604 s            |
| CH bend/OCH <sub>3</sub>                                |                    |                      |                   |                   | 1498 vw           |
| CH bend/r                                               | 1475 m             | 1470 m               | 1475 m            | 1462 w            | 1457 vw           |
| CH bend/SCH <sub>3</sub>                                |                    |                      |                   |                   | 1424 vw           |
| CH bend/OCH <sub>3</sub>                                |                    |                      |                   |                   | 1317 vw           |
| C-O str/OCH <sub>3</sub>                                |                    |                      |                   |                   |                   |
| CH bend/CH <sub>3</sub>                                 |                    |                      |                   |                   |                   |
| C <sub>r</sub> -C str/C <sub>r</sub> CH <sub>3</sub>    |                    |                      | 1230 w            |                   |                   |
| C <sub>r</sub> -C str/C <sub>r</sub> CH <sub>2</sub> OH | 1294 vw            |                      |                   |                   |                   |
| CH bend/CH <sub>2</sub>                                 |                    | 1265 w               |                   |                   |                   |
| CH bend/CH <sub>2</sub> COOH                            |                    | 1193 m               |                   |                   |                   |
| CH bend/r                                               | 1183 m             |                      | 1199 vw           | 1104 s            |                   |
| C <sub>r</sub> -S str/C <sub>r</sub> SCH <sub>3</sub>   | 1101 vs            | 1103 vs              | 1107 vs           | 1095 vs           | 1119 vs           |
| CH bend/r                                               |                    |                      |                   |                   |                   |
| CH bend/r                                               | 998 w              | 1002 m               | 1001 w            | 1009 m            | 998 w             |
| CH bend/SCH <sub>3</sub>                                |                    |                      |                   |                   |                   |
| Breathing/r                                             | 803 w              | 813 vw               | 802 m             |                   | 804 w             |
| S-CH <sub>3</sub> str                                   | 721 w              | 719 vw               | 721 vw            | 737 s             | 719 w             |
| C <sub>r</sub> -S str/C <sub>r</sub> SCH <sub>3</sub>   | 657 w              | 680 vw               | 641 m             |                   | 664 w             |
| Deformation/r                                           | 524 w              | 459 m                | 408 m             | 428 vs            | 503 w             |

<sup>a</sup> Intensity description: vs = very strong, s = strong, m = medium, w = weak, vw = very weak.  
Abbreviations used in table: str: stretching, r: ring.

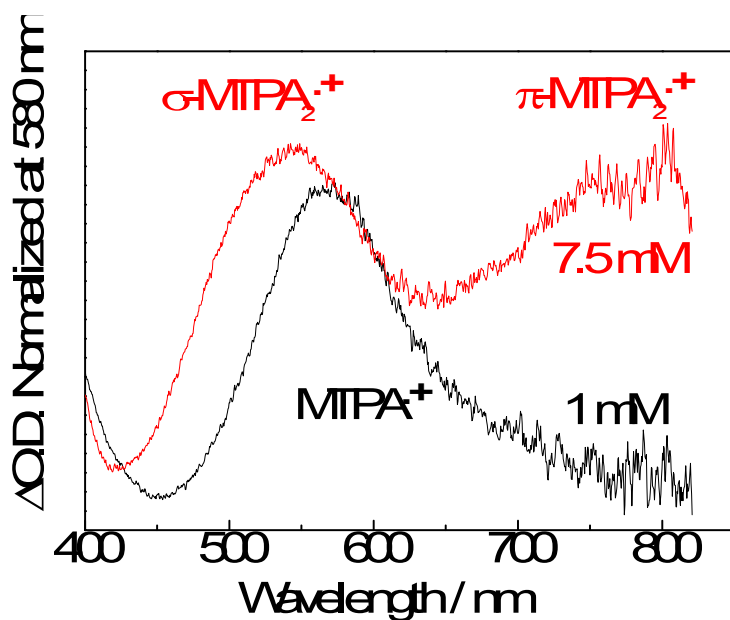

**Figure S6.** ns-TA spectra observed at 500 ns after an electron pulse during the pulse radiolysis of MTPA with 1 mM (black) and 7.5 mM (red) in  $\text{N}_2\text{O}$ -saturated aqueous solution (pH 7) containing NaBr (100 mM). The optical densities of two spectra are normalized at 580 nm.

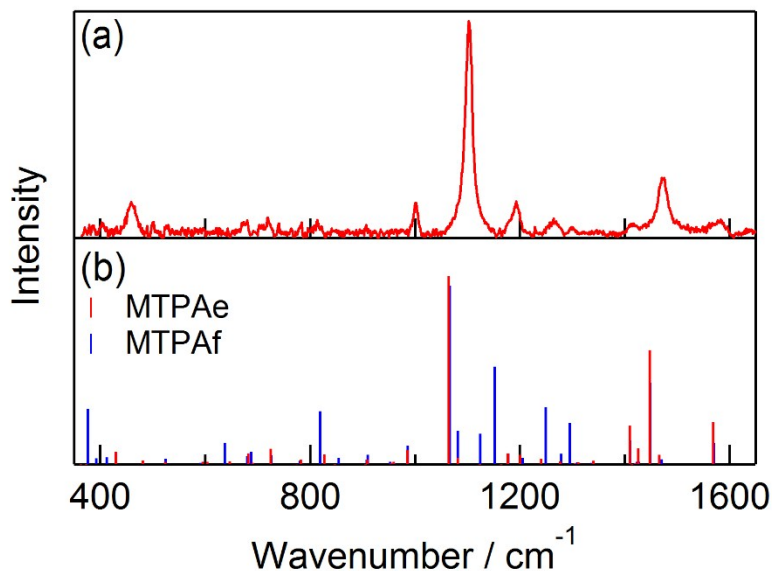

**Figure S7.** (a) ns- $\text{TR}^3$  spectrum observed at 500 ns after an 8-ns electron pulse during the pulse radiolysis of MTPA (1 mM) in  $\text{N}_2\text{O}$ -saturated aqueous solution containing NaBr (100 mM). Probe: 532

nm. (b) Raman peaks of two conformers of MTPM<sup>•+</sup> (Table S2) calculated by TDDFT at UBP86/TZVP level.

**Table S8.** Bond lengths (Å) of ArSCH<sub>3</sub> and ArSCH<sub>3</sub><sup>•+</sup> by the DFT calculation at the UB3LYP/6-311+G(d,p) level.<sup>a</sup>

| Bond                           | MTPM  | MTPM <sup>•+</sup> | MTPA  | MTPA <sup>•+</sup> | MTT   | MTT <sup>•+</sup> | MTB   | MTB <sup>•+</sup> | MTA   | MTA <sup>•+</sup> |
|--------------------------------|-------|--------------------|-------|--------------------|-------|-------------------|-------|-------------------|-------|-------------------|
| C <sub>1</sub> -S              | 1.798 | 1.720              | 1.781 | 1.721              | 1.784 | 1.719             | 1.800 | 1.719             | 1.787 | 1.723             |
| C <sub>1</sub> -C <sub>2</sub> | 1.398 | 1.428              | 1.397 | 1.419              | 1.396 | 1.420             | 1.399 | 1.428             | 1.397 | 1.427             |
| C <sub>2</sub> -C <sub>3</sub> | 1.392 | 1.372              | 1.395 | 1.374              | 1.397 | 1.374             | 1.394 | 1.378             | 1.394 | 1.371             |
| C <sub>3</sub> -C <sub>4</sub> | 1.399 | 1.419              | 1.393 | 1.419              | 1.394 | 1.420             | 1.394 | 1.404             | 1.398 | 1.418             |
| C <sub>4</sub> -C <sub>5</sub> | 1.397 | 1.414              | 1.400 | 1.412              | 1.402 | 1.415             | 1.394 | 1.410             | 1.397 | 1.425             |
| C <sub>5</sub> -C <sub>6</sub> | 1.391 | 1.376              | 1.388 | 1.375              | 1.388 | 1.374             | 1.394 | 1.377             | 1.390 | 1.368             |
| C <sub>6</sub> -C <sub>1</sub> | 1.399 | 1.419              | 1.403 | 1.426              | 1.403 | 1.427             | 1.399 | 1.420             | 1.401 | 1.421             |
| C <sub>4</sub> -C <sub>9</sub> | 1.516 | 1.497              | -     | -                  | -     | -                 | -     | -                 | -     | -                 |
| C <sub>4</sub> -O              | -     | -                  | -     | -                  | -     | -                 | -     | -                 | 1.367 | 1.317             |

<sup>a</sup> Bond length of the most stable conformers (MTPMd<sup>•+</sup>, MTPAf<sup>•+</sup>, MTTc<sup>•+</sup>, MTBc<sup>•+</sup>, and MTAd<sup>•+</sup>, See Table S1-S5) are indicated.

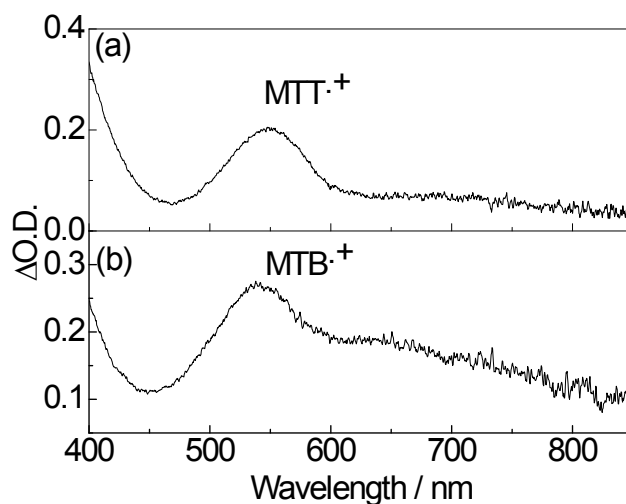

**Figure S8.** ns-TA spectra observed at 500 ns after an electron pulse during the pulse radiolysis of (a) MTT and (b) MTB with 1 mM in N<sub>2</sub>O-saturated aqueous solution (pH 7) containing NaBr (100 mM).

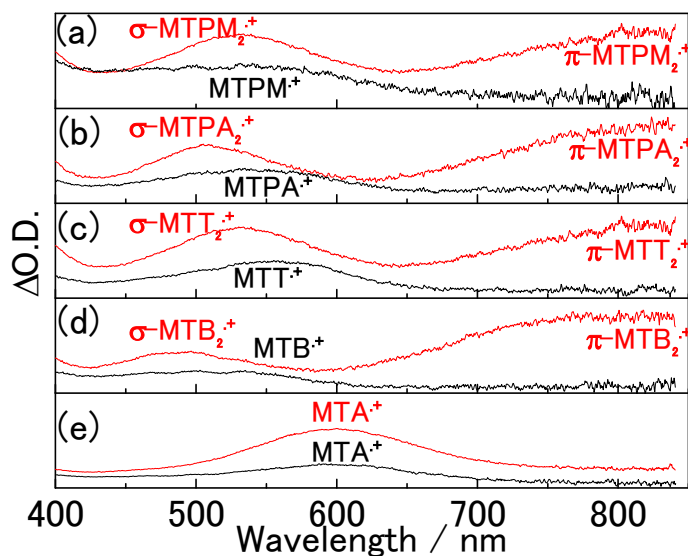

**Figure S9.** ns-TA spectra observed at 50 ns after an electron pulse during the pulse radiolysis of ArSCH<sub>3</sub> with 1 mM (black) and 50 mM (red) in benzonitrile. (a) MTPM, (b) MTPA, (c) MTT, (d) MTB and (e) MTA.

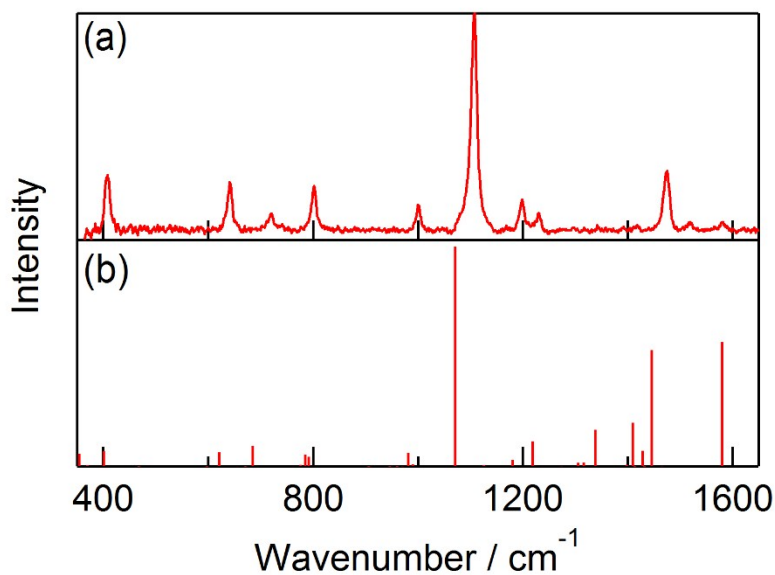

**Figure S10.** (a) ns-TR<sup>3</sup> spectrum observed at 500 ns after an 8-ns electron pulse during the pulse radiolysis of MTT (1 mM) in N<sub>2</sub>O-saturated aqueous solution containing NaBr (100 mM). Probe: 532 nm. (b) Raman peaks of MTT<sup>•+</sup> calculated by TDDFT at UBP86/TZVP level.

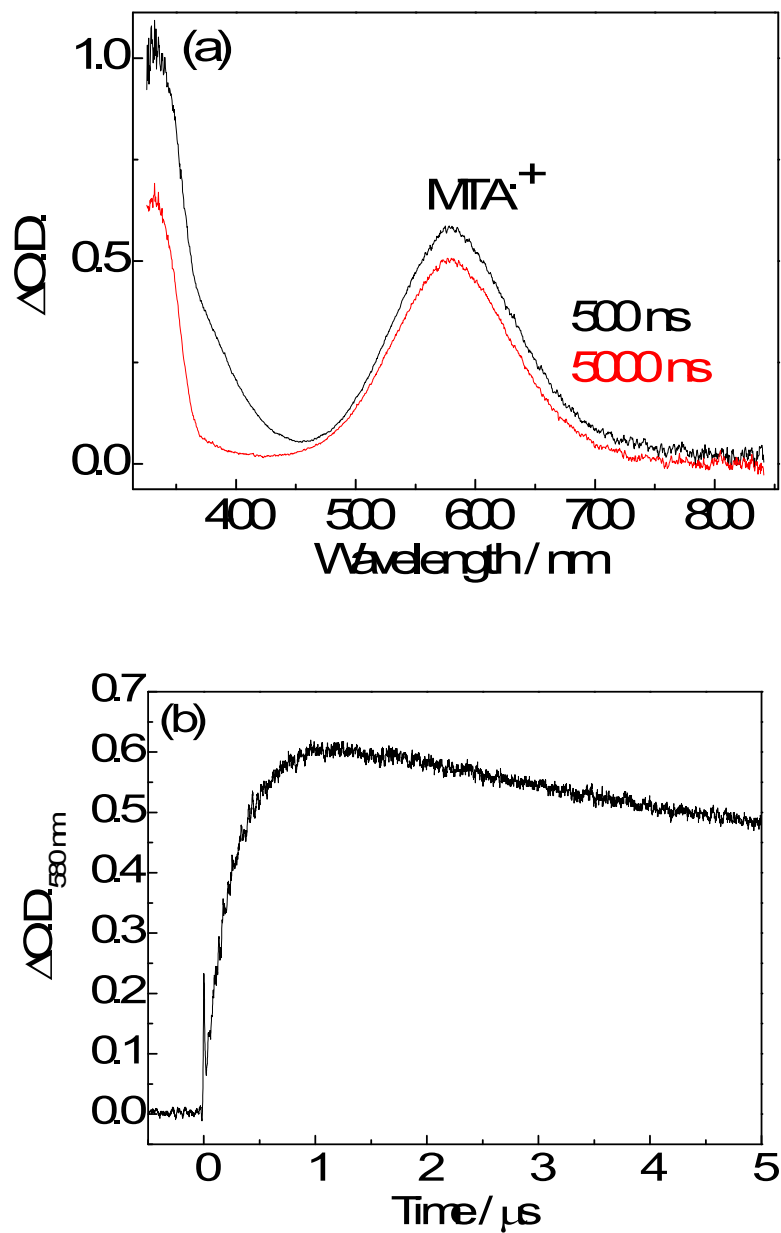

**Figure S11.** (a) ns-TA spectra observed at 500 (black) and 5000 (red) ns after an electron pulse during the pulse radiolysis of MTA 1 mM with in  $N_2O$ -saturated aqueous solution (pH 7) containing NaBr (100 mM). (b) Time profiles of ns-TA at 580 nm showing the formation of  $MTA^{\bullet+}$  after an electron pulse during the pulse radiolysis of MTA 1 mM with in  $N_2O$ -saturated aqueous solution (pH 7) containing NaBr (100 mM).

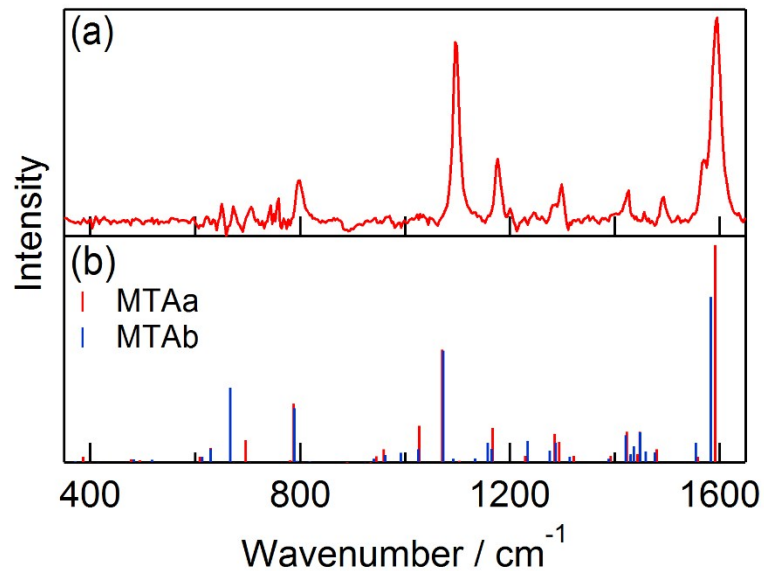

**Figure S12.** (a) Raman spectrum of MTA in DCE. (b) Theoretically estimated Raman spectra of conformers at B3LYP/6-311+G(d,p) level.

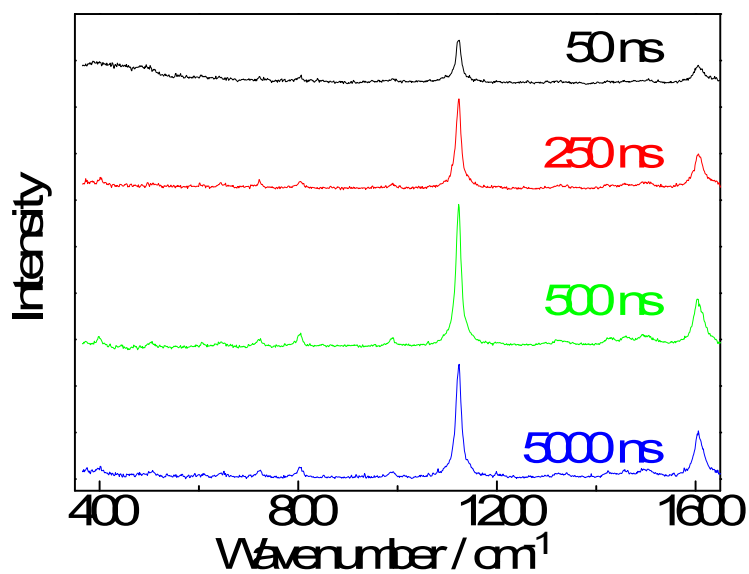

**Figure S13.** ns-TR<sup>3</sup> spectra observed at various times after an electron pulse during the pulse radiolysis of MTA(1 mM) in N<sub>2</sub>O-saturated aqueous solution containing NaBr (100 mM) excited at 532 nm.



**Table S9.** XYZ coordinate of MTPMa by B3LYP/6-311+G(d,p).

|   | X        | Y        | Z        |
|---|----------|----------|----------|
| C | -1.02395 | -0.24581 | -0.02395 |
| C | -0.56095 | 1.071534 | 0.010745 |
| C | 0.808409 | 1.331381 | -0.01671 |
| C | 1.741134 | 0.29887  | -0.09036 |
| C | 1.271515 | -1.0176  | -0.1198  |
| C | -0.08921 | -1.28837 | -0.08481 |
| S | -2.74556 | -0.71635 | 0.014213 |
| C | -3.62249 | 0.87697  | 0.083182 |
| C | 3.217556 | 0.601207 | -0.17656 |
| O | 3.962865 | -0.48668 | 0.363193 |
| H | -1.25108 | 1.902693 | 0.069485 |
| H | 1.146923 | 2.362591 | 0.024037 |
| H | 1.98657  | -1.8296  | -0.15457 |
| H | -0.43202 | -2.31737 | -0.1031  |
| H | -4.68259 | 0.623004 | 0.10124  |
| H | -3.42005 | 1.483669 | -0.80023 |
| H | -3.37701 | 1.430166 | 0.990444 |
| H | 3.428506 | 1.533283 | 0.366264 |
| H | 3.49142  | 0.766399 | -1.22999 |
| H | 4.883221 | -0.36903 | 0.11297  |

**Table S10.** XYZ coordinate of MTPMb by B3LYP/6-311+G(d,p).

|   | X        | Y        | Z        |
|---|----------|----------|----------|
| C | 1.047572 | 0.30454  | -0.00567 |
| C | 0.356376 | -0.90692 | -0.05457 |
| C | -1.03883 | -0.92364 | -0.0738  |

|   |          |          |          |
|---|----------|----------|----------|
| C | -1.77056 | 0.259613 | -0.04215 |
| C | -1.07259 | 1.471084 | 0.014758 |
| C | 0.31382  | 1.499163 | 0.029482 |
| S | 2.82614  | 0.459626 | 0.019423 |
| C | 3.404039 | -1.26626 | 0.011586 |
| C | -3.28007 | 0.257864 | -0.09286 |
| O | -3.77181 | -1.04917 | 0.179646 |
| H | 0.888591 | -1.84878 | -0.07703 |
| H | -1.56766 | -1.86727 | -0.10595 |
| H | -1.61903 | 2.40913  | 0.051611 |
| H | 0.833228 | 2.450187 | 0.076063 |
| H | 4.492355 | -1.20714 | 0.037866 |
| H | 3.100593 | -1.7859  | -0.89789 |
| H | 3.0578   | -1.80673 | 0.893223 |
| H | -3.60635 | 0.593274 | -1.08931 |
| H | -3.66532 | 0.983684 | 0.638038 |
| H | -4.7165  | -1.05383 | 0.004746 |

**Table S11.** XYZ coordinate of MTPMc by B3LYP/6-311+G(d,p).

|   | X        | Y        | Z        |
|---|----------|----------|----------|
| C | -1.04452 | 0.070877 | -0.31274 |
| C | -0.23534 | -1.06546 | -0.37214 |
| C | 1.145786 | -0.95973 | -0.22005 |
| C | 1.740524 | 0.284256 | -0.01155 |
| C | 0.928824 | 1.42118  | 0.044454 |
| C | -0.44926 | 1.320327 | -0.1097  |
| S | -2.823   | -0.0609  | -0.54321 |
| C | -3.36991 | -0.33411 | 1.18722  |
| C | 3.23852  | 0.426191 | 0.126175 |

|   |          |          |          |
|---|----------|----------|----------|
| O | 3.834173 | -0.85339 | 0.292708 |
| H | -0.68968 | -2.03442 | -0.54312 |
| H | 1.771977 | -1.84102 | -0.26186 |
| H | 1.376253 | 2.397478 | 0.207501 |
| H | -1.0698  | 2.207903 | -0.074   |
| H | -4.45613 | -0.43057 | 1.154558 |
| H | -3.10308 | 0.514002 | 1.817842 |
| H | -2.93967 | -1.25088 | 1.590347 |
| H | 3.458146 | 1.07854  | 0.983803 |
| H | 3.630606 | 0.924882 | -0.77311 |
| H | 4.788219 | -0.74558 | 0.257716 |

**Table S12.** XYZ coordinate of MTPM<sup>d+</sup> by UB3LYP/6-311+G(d,p).

|   | X        | Y        | Z        |
|---|----------|----------|----------|
| C | 1.044755 | 0.288198 | -0.00018 |
| C | 0.344671 | -0.94617 | -0.00049 |
| C | -1.0306  | -0.94996 | -0.00045 |
| C | -1.7558  | 0.263341 | -0.00011 |
| C | -1.0572  | 1.492806 | -0.0002  |
| C | 0.313829 | 1.515137 | -0.00022 |
| S | 2.756393 | 0.453585 | 0.00027  |
| C | 3.437964 | -1.23191 | 0.000202 |
| C | -3.25192 | 0.258635 | 0.000297 |
| O | -3.72924 | -1.06071 | 0.000302 |
| H | 0.881672 | -1.88484 | -0.00084 |
| H | -1.58278 | -1.87991 | -0.00065 |
| H | -1.60857 | 2.426361 | -0.00024 |
| H | 0.848269 | 2.458028 | -0.00024 |
| H | 4.519184 | -1.09797 | 0.000285 |

|   |          |          |          |
|---|----------|----------|----------|
| H | 3.136743 | -1.76549 | -0.90092 |
| H | 3.136594 | -1.76571 | 0.901119 |
| H | -3.59127 | 0.826963 | -0.88257 |
| H | -3.59085 | 0.826884 | 0.883333 |
| H | -4.69159 | -1.05648 | 0.000821 |

**Table S13.** XYZ coordinate of MTPMe<sup>•+</sup> by UB3LYP/6-311+G(d,p).

|   | X        | Y        | Z        |
|---|----------|----------|----------|
| C | -1.0233  | -0.22692 | 0.000001 |
| C | -0.56821 | 1.118078 | 0.000003 |
| C | 0.780712 | 1.372857 | 0.000001 |
| C | 1.724406 | 0.314688 | -2E-06   |
| C | 1.272078 | -1.01954 | -2E-06   |
| C | -0.07504 | -1.2931  | 0        |
| S | -2.67254 | -0.71483 | 0.000002 |
| C | -3.66158 | 0.81045  | -4E-06   |
| C | 3.186348 | 0.630601 | -2E-06   |
| O | 3.93469  | -0.5549  | 0.000001 |
| H | -1.27062 | 1.940009 | 0.000008 |
| H | 1.129643 | 2.399724 | 0.000002 |
| H | 2.002152 | -1.81712 | -2E-06   |
| H | -0.42437 | -2.31942 | 0        |
| H | -4.69793 | 0.474372 | -5E-06   |
| H | -3.46719 | 1.391704 | -0.90107 |
| H | -3.46719 | 1.391705 | 0.901063 |
| H | 3.396013 | 1.259087 | 0.882839 |
| H | 3.396012 | 1.259082 | -0.88285 |
| H | 4.874023 | -0.3454  | 0.000003 |

**Table S14.** XYZ coordinate of MTPAa by B3LYP/6-311+G(d,p).

|   | X        | Y        | Z        |
|---|----------|----------|----------|
| C | 1.73675  | -0.23593 | -0.12118 |
| C | 1.193298 | 1.04964  | -0.07571 |
| C | -0.17137 | 1.240556 | -0.29627 |
| C | -1.02228 | 0.170416 | -0.56535 |
| C | -0.46791 | -1.11434 | -0.60971 |
| C | 0.88646  | -1.31896 | -0.39189 |
| S | 3.457977 | -0.61848 | 0.13606  |
| C | 4.208894 | 1.001089 | 0.491047 |
| C | -2.49392 | 0.395662 | -0.80406 |
| C | -3.39702 | -0.03528 | 0.339502 |
| O | -3.09522 | -0.71636 | 1.283444 |
| O | -4.65781 | 0.438925 | 0.154689 |
| H | 1.81574  | 1.910795 | 0.12773  |
| H | -0.57139 | 2.249021 | -0.25699 |
| H | -1.10456 | -1.96944 | -0.80979 |
| H | 1.290526 | -2.32474 | -0.42934 |
| H | 5.265489 | 0.796319 | 0.665894 |
| H | 3.78349  | 1.450993 | 1.389009 |
| H | 4.117663 | 1.681196 | -0.35684 |
| H | -2.83853 | -0.15643 | -1.68688 |
| H | -2.70385 | 1.44694  | -1.01553 |
| H | -5.19546 | 0.113381 | 0.89236  |

**Table S15.** XYZ coordinate of MTPAb by B3LYP/6-311+G(d,p).

|   | X        | Y        | Z        |
|---|----------|----------|----------|
| C | -1.74567 | 0.321025 | 0.000383 |

|   |          |          |          |
|---|----------|----------|----------|
| C | -1.08036 | -0.81233 | 0.478715 |
| C | 0.291488 | -0.77285 | 0.717577 |
| C | 1.034785 | 0.385685 | 0.490117 |
| C | 0.361074 | 1.514421 | 0.0131   |
| C | -1.00665 | 1.488885 | -0.22999 |
| S | -3.49358 | 0.400089 | -0.33833 |
| C | -4.07527 | -1.2899  | 0.006954 |
| C | 2.52018  | 0.430877 | 0.748968 |
| C | 3.363394 | -0.34889 | -0.24624 |
| O | 2.987249 | -1.21941 | -0.98605 |
| O | 4.663508 | 0.041914 | -0.18105 |
| H | -1.61696 | -1.73233 | 0.668608 |
| H | 0.786083 | -1.6676  | 1.079671 |
| H | 0.911785 | 2.431114 | -0.17292 |
| H | -1.50352 | 2.378721 | -0.60089 |
| H | -5.14314 | -1.27686 | -0.21303 |
| H | -3.93509 | -1.55758 | 1.054962 |
| H | -3.58985 | -2.01979 | -0.64205 |
| H | 2.758831 | 0.011886 | 1.734519 |
| H | 2.886723 | 1.459374 | 0.768997 |
| H | 5.158548 | -0.50994 | -0.80537 |

**Table S16.** XYZ coordinate of MTPAc by B3LYP/6-311+G(d,p).

|   | X        | Y        | Z        |
|---|----------|----------|----------|
| C | 1.766777 | 0.347147 | -0.18889 |
| C | 1.09587  | 1.194894 | 0.694587 |
| C | -0.29056 | 1.323675 | 0.626706 |
| C | -1.03256 | 0.609475 | -0.31561 |

|   |          |          |          |
|---|----------|----------|----------|
| C | -0.35351 | -0.23299 | -1.20137 |
| C | 1.030239 | -0.35971 | -1.14556 |
| S | 3.558859 | 0.214006 | -0.12804 |
| C | 3.747557 | -1.36728 | 0.78436  |
| C | -2.53287 | 0.752547 | -0.37845 |
| C | -3.30229 | -0.42711 | 0.192267 |
| O | -2.85693 | -1.50164 | 0.497203 |
| O | -4.62157 | -0.12281 | 0.305251 |
| H | 1.660218 | 1.754551 | 1.430923 |
| H | -0.79698 | 1.988958 | 1.3188   |
| H | -0.90979 | -0.79399 | -1.94475 |
| H | 1.545353 | -1.00194 | -1.85031 |
| H | 4.820674 | -1.54384 | 0.871151 |
| H | 3.292054 | -2.19146 | 0.235376 |
| H | 3.311991 | -1.29364 | 1.780844 |
| H | -2.87297 | 0.868174 | -1.4142  |
| H | -2.86766 | 1.651938 | 0.144024 |
| H | -5.06846 | -0.91112 | 0.648949 |

**Table S17.** XYZ coordinate of MTPAd by B3LYP/6-311+G(d,p).

|   | X        | Y        | Z        |
|---|----------|----------|----------|
| C | -1.72223 | 0.000552 | -0.24855 |
| C | -0.98924 | -1.05331 | 0.307884 |
| C | 0.350775 | -0.88098 | 0.63796  |
| C | 0.993596 | 0.339698 | 0.408033 |
| C | 0.260233 | 1.38343  | -0.15938 |
| C | -1.08557 | 1.220378 | -0.48473 |
| S | -3.44685 | -0.2226  | -0.70613 |

|   |          |          |          |
|---|----------|----------|----------|
| C | -4.26164 | 0.016641 | 0.92075  |
| C | 2.447574 | 0.533429 | 0.762678 |
| C | 3.423    | -0.21462 | -0.13096 |
| O | 3.170745 | -1.13232 | -0.86577 |
| O | 4.680915 | 0.274099 | 0.024367 |
| H | -1.46966 | -2.01073 | 0.472214 |
| H | 0.905794 | -1.7107  | 1.061513 |
| H | 0.74112  | 2.337658 | -0.34978 |
| H | -1.64341 | 2.038638 | -0.92427 |
| H | -5.33201 | -0.10418 | 0.747404 |
| H | -4.0702  | 1.017902 | 1.307111 |
| H | -3.92867 | -0.73345 | 1.638336 |
| H | 2.648842 | 0.186814 | 1.783734 |
| H | 2.720352 | 1.590715 | 0.749214 |
| H | 5.265122 | -0.25655 | -0.53829 |

**Table S18.** XYZ coordinate of MTPAe<sup>+</sup> by UB3LYP/6-311+G(d,p).

|   | X        | Y        | Z        |
|---|----------|----------|----------|
| C | 1.717174 | -0.19645 | 0.118478 |
| C | 1.235099 | 1.131038 | -0.01819 |
| C | -0.1051  | 1.38306  | 0.163734 |
| C | -1.01305 | 0.345288 | 0.484549 |
| C | -0.52429 | -0.97462 | 0.623097 |
| C | 0.809789 | -1.24824 | 0.446965 |
| S | 3.354023 | -0.67959 | -0.0856  |
| C | 4.291505 | 0.820806 | -0.5037  |
| C | -2.46718 | 0.648368 | 0.672839 |
| C | -3.38276 | -0.12917 | -0.28135 |



|   |          |          |          |
|---|----------|----------|----------|
| O | -3.07461 | -1.12494 | -0.87868 |
| O | -4.58825 | 0.452278 | -0.32929 |
| H | 1.905617 | 1.942568 | -0.26558 |
| H | -0.47476 | 2.396127 | 0.056043 |
| H | -1.20968 | -1.77821 | 0.856488 |
| H | 1.178855 | -2.26224 | 0.550867 |
| H | 5.320221 | 0.484159 | -0.62897 |
| H | 4.240109 | 1.542576 | 0.311388 |
| H | 3.930281 | 1.247538 | -1.43933 |
| H | -2.67535 | 1.714157 | 0.577435 |
| H | -2.7791  | 0.359154 | 1.685833 |
| H | -5.16472 | -0.07169 | -0.90937 |

**Table S19.** XYZ coordinate of MTPAF<sup>+</sup> by UB3LYP/6-311+G(d,p).

|   | X        | Y        | Z        |
|---|----------|----------|----------|
| C | -1.73359 | 0.311897 | -0.00019 |
| C | -1.00391 | -0.82085 | 0.444421 |
| C | 0.351492 | -0.71851 | 0.643869 |
| C | 1.036714 | 0.503522 | 0.414    |
| C | 0.302976 | 1.627464 | -0.01959 |
| C | -1.05449 | 1.546561 | -0.22604 |
| S | -3.42403 | 0.340762 | -0.31027 |
| C | -4.04294 | -1.33359 | 0.033205 |
| C | 2.515708 | 0.600791 | 0.62972  |
| C | 3.32141  | -0.40152 | -0.2041  |
| O | 2.874233 | -1.39263 | -0.71684 |
| O | 4.604974 | -0.02467 | -0.25636 |
| H | -1.50111 | -1.76427 | 0.623363 |

|   |          |          |          |
|---|----------|----------|----------|
| H | 0.909779 | -1.58646 | 0.968207 |
| H | 0.814957 | 2.565607 | -0.1975  |
| H | -1.61122 | 2.413144 | -0.56404 |
| H | -5.11115 | -1.28772 | -0.17669 |
| H | -3.88663 | -1.59041 | 1.080885 |
| H | -3.56997 | -2.05735 | -0.63051 |
| H | 2.753736 | 0.378639 | 1.679256 |
| H | 2.887179 | 1.607245 | 0.436218 |
| H | 5.104992 | -0.68688 | -0.76113 |

**Table S20.** XYZ coordinate of MTBa by B3LYP/6-311+G(d,p).

|   | X        | Y        | Z        |
|---|----------|----------|----------|
| C | -0.10985 | -0.22985 | 0.000006 |
| C | 0.835715 | -1.26656 | -1E-06   |
| C | 2.194874 | -0.97759 | -6E-06   |
| C | 2.638122 | 0.346284 | -3E-06   |
| C | 1.701801 | 1.375442 | 0.000003 |
| C | 0.334312 | 1.096111 | 0.000006 |
| S | -1.82419 | -0.71994 | 0.000004 |
| C | -2.72519 | 0.861513 | -9E-06   |
| H | 0.502245 | -2.29872 | -1E-06   |
| H | 2.911572 | -1.79139 | -0.00001 |
| H | 3.69856  | 0.569229 | -6E-06   |
| H | 2.029934 | 2.409182 | 0.000003 |
| H | -0.37022 | 1.917213 | 0.000008 |
| H | -3.78139 | 0.59063  | -0.00002 |
| H | -2.5112  | 1.445406 | 0.896094 |
| H | -2.51118 | 1.445404 | -0.89611 |

**Table S21.** XYZ coordinate of MTBb by B3LYP/6-311+G(d,p).

|   | X        | Y        | Z        |
|---|----------|----------|----------|
| C | 0.123257 | -2E-06   | -0.27115 |
| C | -0.57037 | -1.20816 | -0.14835 |
| C | -1.94055 | -1.20631 | 0.108223 |
| C | -2.62705 | 0.000002 | 0.238641 |
| C | -1.94055 | 1.206312 | 0.10822  |
| C | -0.57037 | 1.208161 | -0.14835 |
| S | 1.885493 | -3E-06   | -0.63626 |
| C | 2.579555 | 0.000004 | 1.062776 |
| H | -0.03512 | -2.14369 | -0.26088 |
| H | -2.47134 | -2.14731 | 0.201115 |
| H | -3.69329 | 0.000003 | 0.435016 |
| H | -2.47133 | 2.147308 | 0.201111 |
| H | -0.03512 | 2.14369  | -0.26089 |
| H | 3.664758 | 0.000006 | 0.950101 |
| H | 2.274987 | 0.893989 | 1.607264 |
| H | 2.274991 | -0.89398 | 1.60727  |

**Table S22.** XYZ coordinate of MTBc<sup>+</sup> by UB3LYP/6-311+G(d,p).

|   | X        | Y        | Z      |
|---|----------|----------|--------|
| C | -0.11633 | -0.21049 | -1E-06 |
| C | 0.831451 | -1.2791  | 0      |
| C | 2.179536 | -0.9939  | 0      |
| C | 2.610096 | 0.342169 | 0      |
| C | 1.679036 | 1.400605 | 0      |
| C | 0.326766 | 1.138411 | -1E-06 |

|   |          |          |          |
|---|----------|----------|----------|
| S | -1.76275 | -0.70657 | -1E-06   |
| C | -2.76822 | 0.806726 | 0.000001 |
| H | 0.483597 | -2.3059  | 0.000002 |
| H | 2.903788 | -1.79875 | 0.000001 |
| H | 3.670713 | 0.564832 | 0.000001 |
| H | 2.030073 | 2.425183 | 0        |
| H | -0.3824  | 1.954768 | -1E-06   |
| H | -3.8009  | 0.459014 | 0.000008 |
| H | -2.57745 | 1.389752 | 0.901179 |
| H | -2.57746 | 1.389747 | -0.90118 |

**Table S23.** XYZ coordinate of MTTa by B3LYP/6-311+G(d,p).

|   | X        | Y        | Z        |
|---|----------|----------|----------|
| C | 0.60315  | -0.26325 | -6E-06   |
| C | 0.063151 | 1.023687 | -1.5E-05 |
| C | -1.32203 | 1.204284 | -1.1E-05 |
| C | -2.20289 | 0.123677 | 0.000001 |
| C | -1.64657 | -1.16345 | 0.00001  |
| C | -0.27293 | -1.35945 | 0.000007 |
| S | 2.348071 | -0.63431 | -1.6E-05 |
| C | 3.133891 | 1.007277 | 0.000029 |
| C | -3.69943 | 0.320988 | 0.000006 |
| H | 0.703609 | 1.895932 | -2.7E-05 |
| H | -1.71674 | 2.215538 | -1.7E-05 |
| H | -2.30125 | -2.02969 | 0.00002  |
| H | 0.126421 | -2.36811 | 0.000018 |
| H | 4.206943 | 0.813569 | 0.000043 |
| H | 2.878035 | 1.574497 | 0.89596  |

|   |          |          |          |
|---|----------|----------|----------|
| H | 2.878067 | 1.574534 | -0.89589 |
| H | -3.95946 | 1.381535 | -9E-06   |
| H | -4.16144 | -0.13566 | 0.881069 |
| H | -4.16145 | -0.13569 | -0.88104 |

**Table S24.** XYZ coordinate of MTTb by B3LYP/6-311+G(d,p).

|   | X        | Y        | Z        |
|---|----------|----------|----------|
| C | 0.612286 | -3E-06   | -0.30237 |
| C | -0.09264 | 1.203901 | -0.21675 |
| C | -1.4734  | 1.199222 | -0.03335 |
| C | -2.1871  | 0.000001 | 0.066051 |
| C | -1.4734  | -1.19922 | -0.03334 |
| C | -0.09264 | -1.20391 | -0.21674 |
| S | 2.389227 | -7E-06   | -0.57755 |
| C | 2.999695 | 0.000012 | 1.1534   |
| C | -3.67925 | 0.000004 | 0.29306  |
| H | 0.441831 | 2.142757 | -0.30403 |
| H | -2.00445 | 2.144121 | 0.025902 |
| H | -2.00445 | -2.14412 | 0.025921 |
| H | 0.441825 | -2.14276 | -0.30401 |
| H | 4.089235 | 0.000011 | 1.094795 |
| H | 2.668435 | -0.89384 | 1.682404 |
| H | 2.668435 | 0.893877 | 1.682384 |
| H | -4.14909 | 0.884516 | -0.14308 |
| H | -3.91169 | 0.000023 | 1.363752 |
| H | -4.14909 | -0.88453 | -0.14305 |

**Table S25.** XYZ coordinate of MTTc<sup>•+</sup> by UB3LYP/6-311+G(d,p).

|  | X | Y | Z |
|--|---|---|---|
|--|---|---|---|

|   |          |          |          |
|---|----------|----------|----------|
| C | 0.605424 | -0.24787 | -0.00127 |
| C | 0.060711 | 1.063276 | -0.00517 |
| C | -1.30309 | 1.228879 | -0.0112  |
| C | -2.18612 | 0.116438 | -0.01154 |
| C | -1.63159 | -1.18496 | -0.00891 |
| C | -0.27118 | -1.37437 | -0.00311 |
| S | 2.282894 | -0.62371 | 0.004403 |
| C | 3.169752 | 0.963634 | 0.003803 |
| C | -3.66325 | 0.323265 | 0.010479 |
| H | 0.706836 | 1.930549 | -0.00638 |
| H | -1.71817 | 2.23021  | -0.01729 |
| H | -2.29154 | -2.04429 | -0.01363 |
| H | 0.143254 | -2.37621 | -0.00246 |
| H | 4.225878 | 0.695559 | 0.007707 |
| H | 2.934656 | 1.532969 | 0.902935 |
| H | 2.940208 | 1.529034 | -0.89923 |
| H | -3.95393 | 1.211971 | -0.55368 |
| H | -3.99466 | 0.483089 | 1.046107 |
| H | -4.20277 | -0.54327 | -0.37299 |

**Table S26.** XYZ coordinate of MTAA by B3LYP/6-311+G(d,p).

|   | X        | Y        | Z        |
|---|----------|----------|----------|
| C | -1.03336 | 0.299223 | -5E-06   |
| C | -0.29105 | 1.492697 | 0.000009 |
| C | 1.09222  | 1.468917 | 0.000009 |
| C | 1.781199 | 0.248446 | -2E-06   |
| C | 1.05615  | -0.94114 | -7E-06   |
| C | -0.34368 | -0.91061 | -1.2E-05 |

|   |          |          |          |
|---|----------|----------|----------|
| S | -2.81195 | 0.46252  | -1.5E-05 |
| C | -3.39436 | -1.26116 | 0.000024 |
| O | 3.145732 | 0.333256 | 0.000005 |
| C | 3.897041 | -0.87138 | -1E-06   |
| H | -0.80599 | 2.447348 | 0.000019 |
| H | 1.663934 | 2.389222 | 0.00002  |
| H | 1.555181 | -1.90102 | -5E-06   |
| H | -0.87506 | -1.85326 | -1.8E-05 |
| H | -4.48298 | -1.1989  | 0.000029 |
| H | -3.072   | -1.79372 | -0.89595 |
| H | -3.07199 | -1.79368 | 0.896012 |
| H | 4.943491 | -0.57048 | -8E-06   |
| H | 3.692932 | -1.47094 | 0.894277 |
| H | 3.692916 | -1.47093 | -0.89428 |

**Table S27.** XYZ coordinate of MTAAb by B3LYP/6-311+G(d,p).

|   | X        | Y        | Z        |
|---|----------|----------|----------|
| C | 1.027514 | -0.01319 | -0.30916 |
| C | 0.206695 | 1.112853 | -0.26255 |
| C | -1.17536 | 0.992677 | -0.10323 |
| C | -1.74977 | -0.27609 | 0.010313 |
| C | -0.93355 | -1.41373 | -0.04286 |
| C | 0.436702 | -1.28095 | -0.20507 |
| S | 2.797585 | 0.156978 | -0.55533 |
| C | 3.394004 | 0.133722 | 1.180546 |
| O | -3.08307 | -0.51018 | 0.168869 |
| C | -3.96969 | 0.600145 | 0.220639 |
| H | 0.64806  | 2.098162 | -0.3566  |

|   |          |          |          |
|---|----------|----------|----------|
| H | -1.78303 | 1.887063 | -0.07327 |
| H | -1.39726 | -2.38963 | 0.037173 |
| H | 1.059999 | -2.16587 | -0.25974 |
| H | 4.480049 | 0.229206 | 1.134181 |
| H | 2.982863 | 0.971915 | 1.743622 |
| H | 3.137585 | -0.80728 | 1.667802 |
| H | -4.96538 | 0.178881 | 0.348284 |
| H | -3.74138 | 1.254418 | 1.068869 |
| H | -3.93764 | 1.180282 | -0.7078  |

**Table S28.** XYZ coordinate of MTAc<sup>+</sup> by UB3LYP/6-311+G(d,p).

|   | X        | Y        | Z        |
|---|----------|----------|----------|
| C | -1.03503 | 0.287295 | 0.000002 |
| C | -0.29128 | 1.50679  | 0.000003 |
| C | 1.07347  | 1.483452 | 0.000002 |
| C | 1.765739 | 0.239717 | -2E-06   |
| C | 1.035135 | -0.97813 | 0.000005 |
| C | -0.33866 | -0.94968 | 0.000004 |
| S | -2.74863 | 0.458498 | -2E-06   |
| C | -3.42898 | -1.22936 | -3E-06   |
| O | 3.079917 | 0.324023 | -7E-06   |
| C | 3.918766 | -0.85588 | -1E-06   |
| H | -0.81735 | 2.454484 | 0.000005 |
| H | 1.657158 | 2.395332 | 0.000004 |
| H | 1.549807 | -1.9291  | 0.000012 |
| H | -0.88201 | -1.8848  | 0.000004 |
| H | -4.51023 | -1.09401 | -5E-06   |
| H | -3.13245 | -1.76503 | -0.90139 |



|   |          |          |          |
|---|----------|----------|----------|
| H | -3.13245 | -1.76503 | 0.901387 |
| H | 4.935801 | -0.47542 | -9E-06   |
| H | 3.737756 | -1.44489 | 0.900487 |
| H | 3.737751 | -1.44491 | -0.90048 |

**Table S29.** XYZ coordinate of MTAd<sup>+</sup> by UB3LYP/6-311+G(d,p).

|   | X        | Y        | Z        |
|---|----------|----------|----------|
| C | 1.013784 | -0.23335 | 0.000014 |
| C | 0.066397 | -1.29973 | 0.000021 |
| C | -1.28153 | -1.04661 | 0.000015 |
| C | -1.73669 | 0.29671  | 0.000001 |
| C | -0.7957  | 1.366369 | 0.00002  |
| C | 0.548078 | 1.108877 | 0.000023 |
| S | 2.668488 | -0.71217 | -0.00001 |
| C | 3.638384 | 0.827343 | -2.1E-05 |
| O | -3.00209 | 0.662194 | -1.4E-05 |
| C | -4.07246 | -0.31297 | -2.3E-05 |
| H | 0.419328 | -2.32483 | 0.000035 |
| H | -1.98232 | -1.86982 | 0.000021 |
| H | -1.17728 | 2.379844 | 0.00003  |
| H | 1.245594 | 1.935111 | 0.000033 |
| H | 4.678519 | 0.502639 | -4.3E-05 |
| H | 3.44025  | 1.407153 | -0.90114 |
| H | 3.440289 | 1.407147 | 0.901113 |
| H | -4.98575 | 0.274355 | -2.5E-05 |
| H | -4.01966 | -0.92717 | -0.90031 |
| H | -4.01967 | -0.92719 | 0.90026  |
